# Supplementary material for: Clinical benefit of remdesivir in rhesus macaques infected with SARS-CoV-2
Source: Springer Nature journal article supplement (doi:10.1038/s41586-020-2423-5), 2020-06-09
Supplement: 41586_2020_2423_MOESM1_ESM.pdf [file 41586_2020_2423_MOESM1_ESM.pdf]

---

**Supplementary information**

---

**Clinical benefit of remdesivir in rhesus macaques infected with SARS-CoV-2**

---

In the format provided by the authors and unedited

## Supplementary materials

### Clinical benefit of remdesivir in rhesus macaques infected with SARS-CoV-2

Brandi N. Williamson<sup>1</sup>, Friederike Feldmann<sup>2</sup>, Benjamin Schwarz<sup>3</sup>, Kimberly Meade-White<sup>1</sup>, Danielle P. Porter<sup>5</sup>, Jonathan Schulz<sup>1</sup>, Neeltje van Doremalen<sup>1</sup>, Ian Leighton<sup>3</sup>, Claude Kwe Yinda<sup>1</sup>, Lizzette Pérez-Pérez<sup>1</sup>, Atsushi Okumura<sup>1</sup>, Jamie Lovaglio<sup>2</sup>, Patrick W. Hanley<sup>2</sup>, Greg Saturday<sup>2</sup>, Catharine M. Bosio<sup>3</sup>, Sarah Anzick<sup>4</sup>, Kent Barbian<sup>4</sup>, Tomas Cihlar<sup>5</sup>, Craig Martens<sup>4</sup>, Dana P. Scott<sup>2</sup>, Vincent J. Munster<sup>1</sup>, Emmie de Wit<sup>1\*</sup>

<sup>1</sup>Laboratory of Virology, <sup>2</sup>Rocky Mountain Veterinary Branch, <sup>3</sup>Laboratory of Bacteriology and <sup>4</sup>Research Technologies Branch, National Institute of Allergy and Infectious Diseases, National Institutes of Health, Hamilton, MT, United States of America; <sup>5</sup>Gilead Sciences, Foster City, CA, United States of America

**Table S1. Deep sequencing results to confirm absence of known resistance mutations to remdesivir.**  
The timepoints for sequencing of BAL and swab samples were selected based on positivity in qRT-PCR to reflect the latest possible timepoints where the majority of animals were positive for that given sample type in qRT-PCR.

| Treatment   | Animal no. | Sample                   | Mean sequencing coverage <sup>a</sup> | F476 (nt 14,878-14,880) | V553 (nt 15,109-15,111) |
|-------------|------------|--------------------------|---------------------------------------|-------------------------|-------------------------|
| Remdesivir  | RM1        | BAL <sup>b</sup>         | 197.27                                | no variants             | no variants             |
|             |            | LLLL <sup>c</sup>        | 21.05                                 | no variants             | no variants             |
|             |            | Nose swab <sup>d</sup>   | 138.89                                | no variants             | no variants             |
|             |            | RLLL <sup>e</sup>        | 11.22                                 | no variants             | no variants             |
|             |            | RM2                      | BAL                                   | 21.7                    | no variants             |
|             | LLLL       |                          | 32.65                                 | no variants             | no variants             |
|             | Nose swab  |                          | 187.29                                | no variants             | no variants             |
|             | RLLL       |                          | 19.37                                 | no variants             | no variants             |
|             | RM3        | BAL                      | 4.76                                  | ND <sup>g</sup>         | ND                      |
|             |            | LLLL                     | 5.43                                  | ND                      | ND                      |
|             |            | Nose swab                | 49.11                                 | no variants             | no variants             |
|             |            | RLLL                     | 2.08                                  | no variants             | ND                      |
|             |            | Rectal swab <sup>f</sup> | 35.47                                 | no variants             | no variants             |
|             | RM4        | BAL                      | 421.43                                | no variants             | no variants             |
|             |            | LLLL                     | 81.65                                 | no variants             | no variants             |
|             |            | Nose swab                | 31.97                                 | no variants             | no variants             |
|             |            | RLLL                     | 0.05                                  | ND                      | ND                      |
|             |            | Rectal swab              | 0.56                                  | ND                      | ND                      |
|             | RM5        | BAL                      | 25.37                                 | no variants             | no variants             |
|             |            | LLLL                     | 0.02                                  | ND                      | ND                      |
|             |            | Nose swab                | 25.13                                 | no variants             | no variants             |
|             |            | RLLL                     | 0.31                                  | ND                      | ND                      |
|             | RM6        | BAL                      | 17.1                                  | no variants             | no variants             |
|             |            | LLLL                     | 5.39                                  | no variants             | ND                      |
| Nose swab   |            | 25.27                    | ND                                    | no variants             |                         |
| RLLL        |            | 1.25                     | ND                                    | no variants             |                         |
| Rectal swab |            | 0.42                     | ND                                    | ND                      |                         |
| Vehicle     | RM7        | BAL                      | 352.51                                | no variants             | no variants             |
|             |            | LLLL                     | 123.92                                | no variants             | no variants             |
|             |            | Nose swab                | 1.11                                  | ND                      | no variants             |
|             |            | RLLL                     | 229.79                                | no variants             | no variants             |
|             |            | Rectal swab              | 17.72                                 | no variants             | no variants             |
|             | RM8        | BAL                      | 80.01                                 | no variants             | no variants             |
|             |            | LLLL                     | 16.3                                  | no variants             | no variants             |
|             |            | Nose swab                | 0                                     | ND                      | ND                      |
|             |            | RLLL                     | 4.28                                  | ND                      | ND                      |
|             |            | Rectal swab              | 1.39                                  | ND                      | no variants             |
|             | RM9        | BAL                      | 258.39                                | no variants             | no variants             |
|             |            | LLLL                     | 1.34                                  | ND                      | no variants             |
|             |            | Nose swab                | 0.87                                  | ND                      | ND                      |
|             |            | RLLL                     | 26.65                                 | no variants             | no variants             |

|      |             |         |             |             |
|------|-------------|---------|-------------|-------------|
| RM10 | BAL         | 250.71  | no variants | no variants |
|      | LLLL        | 7.12    | no variants | no variants |
|      | Nose swab   | 0.2     | ND          | ND          |
|      | RLLL        | 1210.31 | no variants | no variants |
|      | Rectal swab | 5.17    | ND          | no variants |
| RM11 | BAL         | 880.97  | no variants | no variants |
|      | LLLL        | 56.38   | no variants | no variants |
|      | Nose swab   | 2.63    | ND          | ND          |
|      | RLLL        | 597.65  | no variants | no variants |
|      | Rectal swab | 0.1     | ND          | ND          |
| RM12 | BAL         | 415.3   | no variants | no variants |
|      | LLLL        | 0.43    | ND          | ND          |
|      | Nose swab   | 20.44   | no variants | no variants |
|      | RLLL        | 88.08   | no variants | no variants |
|      | Rectal swab | 11.56   | ND          | no variants |

<sup>a</sup> Mean sequencing coverage was calculated using the GATK version 3 DepthOfCoverage tool

<sup>b</sup> BAL: bronchoalveolar lavages collected at 3 dpi.

<sup>c</sup> LLLL: left lower lung lobe collected on 7 dpi

<sup>d</sup> collected on 5 dpi

<sup>e</sup> RLLL: right lower lung lobe collected on 7 dpi

<sup>f</sup> collected on 2 dpi

<sup>g</sup> No sequence coverage or coverage was too limited to call
